# Supplementary material for: Species Diversity of Amanita Section Vaginatae in Eastern China, with a Description of Four New Species
Source: MDPI journal article supplement (doi:10.3390/jof9080862), 2023-08-19
Supplement: s1 [file s1]

**Table S1.** Voucher information and GenBank accession numbers of the samples used in the phylogenetic analyses of ITS sequences. Sequences newly generated in this study are indicated in bold.

| Species                         | Voucher           | GenBank No.     | Locality       |
|---------------------------------|-------------------|-----------------|----------------|
| <i>A. albidostipes</i>          | HKAS57358         | MH508500        | China          |
| <i>A. albidostipes</i>          | HKAS95189         | MH508501        | China          |
| <i>A. cf. angustilamellata</i>  | HKAS89451         | MH508292        | China          |
| <i>A. battarrae</i>             | HKAS92090         | MH508266        | China          |
| <i>A. battarrae</i>             | MB-000643         | MH508267        | China          |
| <i>A. brunneofuliginea</i>      | HKAS89226         | MH508269        | China          |
| <i>A. brunneoprocera</i>        | BZ2015-24         | MF461573        | Thailand       |
| <b><i>A. brunneoprocera</i></b> | <b>EFHAAU4162</b> | <b>OR042746</b> | <b>China</b>   |
| <i>A. brunneoumbonata</i>       | BZ2015-67         | MF461579        | Thailand       |
| ' <i>A. ceciliae</i> '          | ASIS26247         | KU139510        | South Korea    |
| ' <i>A. ceciliae</i> '          | ASIS26935         | KU139512        | South Korea    |
| ' <i>A. ceciliae</i> '          | KA12-0916         | KF017930        | South Korea    |
| ' <i>A. ceciliae</i> '          | LEM950069         | AB015694        | Japan          |
| <i>A. ceciliae</i>              | RET 270-1         | OK299148        | United Kingdom |
| <i>A. ceciliae</i>              | RET 305-4         | OK299150        | Germany        |
| <i>A. ceciliae</i>              | SFC20120821-92    | KJ609157        | South Korea    |
| <i>A. changtuia</i>             | HKAS92100         | MH508299        | China          |
| <i>A. chiui</i>                 | HKAS76328         | MH508303        | China          |
| <i>A. cinctipes</i>             | HKAS101388        | MH508304        | China          |
| <i>A. cinctipes</i>             | HKAS78465         | MH508305        | China          |
| <i>A. cingulata</i>             | HKAS100640        | MH508309        | China          |
| <i>A. cingulata</i>             | HKAS75600         | KY949582        | China          |
| <b><i>A. circulata</i></b>      | <b>HKAS127629</b> | <b>OR042763</b> | <b>China</b>   |
| <b><i>A. circulata</i></b>      | <b>HKAS127639</b> | <b>OR042766</b> | <b>China</b>   |
| <b><i>A. circulata</i></b>      | <b>HKAS128052</b> | <b>OR042764</b> | <b>China</b>   |
| <b><i>A. circulata</i></b>      | <b>HKAS97543</b>  | <b>OR042765</b> | <b>China</b>   |
| <i>A. emodotrygon</i>           | MFM-219           | MF489730        | Pakistan       |
| <i>A. emodotrygon</i>           | SUA902            | MF489728        | Pakistan       |
| <i>A. flavidocerea</i>          | BZ2015-60         | MF461578        | Thailand       |
| ' <i>A. fulva</i> '             | ASIS26398         | KU139519        | South Korea    |
| ' <i>A. fulva</i> '             | FB-30952(CBM)     | AB015692        | Japan          |
| <i>A. fulva</i>                 | HKAS96168         | MH508371        | Austria        |
| <i>A. fulva</i>                 | RET 078-8         | MK141039        | Switzerland    |
| <i>A. fulva</i>                 | RET 372-2         | MK522022        | Canada         |
| ' <i>A. fulva</i> '             | KA13-1263         | KR673720        | South Korea    |
| <i>A. griseofolia</i>           | HKAS38159         | NR_119498       | China          |
| <i>A. griseofolia</i>           | HKAS54443         | MH508376        | China          |
| <i>A. griseofolia</i>           | JL2               | ON059312        | China          |
| <i>A. griseofolia</i>           | KA12-0818         | KF017934        | South Korea    |
| <b><i>A. griseofolia</i></b>    | <b>EFHAAU555</b>  | <b>OR042758</b> | <b>China</b>   |

|                                 |                   |                 |                 |
|---------------------------------|-------------------|-----------------|-----------------|
| <i>A. griseoumbonata</i>        | HKAS92103         | MH508389        | China           |
| <i>A. hamadae</i>               | HKAS83451         | MH508395        | China           |
| <b><i>A. hamadae</i></b>        | <b>EFHAAU3013</b> | <b>OR042748</b> | <b>China</b>    |
| <i>A. lignitincta</i>           | HKAS69411         | MH508424        | China           |
| <i>A. liquii</i>                | HKAS54568         | KU714559        | China           |
| <i>A. liquii</i>                | HKAS93915         | MH508427        | China           |
| <b><i>A. multicingulata</i></b> | <b>HKAS127630</b> | <b>OR042750</b> | <b>China</b>    |
| <b><i>A. multicingulata</i></b> | <b>HKAS127631</b> | <b>OR042752</b> | <b>China</b>    |
| <b><i>A. multicingulata</i></b> | <b>HKAS127632</b> | <b>OR042754</b> | <b>China</b>    |
| <b><i>A. multicingulata</i></b> | <b>HKAS127633</b> | <b>OR042753</b> | <b>China</b>    |
| <b><i>A. multicingulata</i></b> | <b>HKAS127634</b> | <b>OR042757</b> | <b>China</b>    |
| <b><i>A. multicingulata</i></b> | <b>HKAS127635</b> | <b>OR042755</b> | <b>China</b>    |
| <b><i>A. multicingulata</i></b> | <b>HKAS128049</b> | <b>OR042751</b> | <b>China</b>    |
| <b><i>A. multicingulata</i></b> | <b>HKAS128054</b> | <b>OR042756</b> | <b>China</b>    |
| <i>A. neocinctipes</i>          | HKAS78463         | MH508443        | China           |
| <i>A. olivaceofusca</i>         | HKAS97581         | MH508457        | China           |
| <i>A. olivaceofusca</i>         | HKAS80243         | MH508455        | China           |
| <i>A. olivaceofusca</i>         | HKAS87076         | MH508456        | China           |
| <i>A. olivaceogrisea</i>        | AF2427            | MF461569        | The Netherlands |
| <b><i>A. orientalis</i></b>     | <b>EFHAAU1367</b> | <b>OR042759</b> | <b>China</b>    |
| <b><i>A. orientalis</i></b>     | <b>HKAS127638</b> | <b>OR042760</b> | <b>China</b>    |
| <i>A. orienticrocea</i>         | HKAS80029         | MH508464        | China           |
| <i>A. orienticrocea</i>         | HKAS90455         | MH508465        | China           |
| <b><i>A. orienticrocea</i></b>  | <b>EFHAAU2919</b> | <b>OR042747</b> | <b>China</b>    |
| <i>A. orientifulva'</i>         | ASIS15547         | KP004956        | South Korea     |
| <i>A. orientifulva</i>          | HKAS32522         | NR_137544       | China           |
| <i>A. orientifulva</i>          | HKAS87937         | MH508468        | China           |
| <i>A. orientifulva'</i>         | MHHNU30269        | MK239233        | China           |
| <i>A. orientifulva'</i>         | STDS-2-10         | LC098745        | Japan           |
| <i>A. orientifulva'</i>         | YJ92              | OM867743        | China           |
| <i>A. orientifulva'</i>         | -                 | FJ375333        | China           |
| <i>A. ovalispora</i>            | HKAS101406        | MH508478        | China           |
| <i>A. pallidocarnea</i>         | HKAS97678         | MH508482        | China           |
| <i>A. pallidozonata</i>         | HKAS100608        | MH508486        | China           |
| <b><i>A. pallidozonata</i></b>  | <b>EFHAAU114</b>  | <b>OR042749</b> | <b>China</b>    |
| <i>A. protecta</i>              | RET 086-6         | NR_154690       | USA             |
| <i>A. protecta</i>              | RET 820-4         | MT073009        | USA             |
| <i>A. pseudovaginata</i>        | HKAS70138         | MH508531        | China           |
| <i>A. aff. pseudovaginata</i>   | LE 296432         | KM658286        | Russia          |
| <i>A. retenta</i>               | HKAS70020         | MH508543        | China           |
| <i>A. shennongjiana</i>         | HKAS75553         | MH508590        | China           |
| <i>A. shennongjiana</i>         | HKAS75554         | MH508591        | China           |
| <b><i>A. sinofulva</i></b>      | <b>EFHAAU207</b>  | <b>OR042739</b> | <b>China</b>    |
| <b><i>A. sinofulva</i></b>      | <b>EFHAAU313</b>  | <b>OR042742</b> | <b>China</b>    |

|                               |                                |          |             |
|-------------------------------|--------------------------------|----------|-------------|
| <i>A. sinofulva</i>           | EFHAAU118                      | OR042740 | China       |
| <i>A. sinofulva</i>           | HKAS75058                      | OR042743 | China       |
| <i>A. sinofulva</i>           | HKAS92355                      | OR042741 | China       |
| <i>Amanita</i> sp.            | GSK-06                         | OK584416 | China       |
| <i>Amanita</i> sp.            | RET 732-8                      | MT013999 | USA         |
| <i>Amanita</i> sp.            | HGS2021-6-18                   | OK643806 | China       |
| <i>Amanita</i> sp.            | RET 371-5                      | MN650861 | Canada      |
| <i>Amanita</i> sp.            | SUA441                         | MW425327 | Pakistan    |
| <i>Amanita</i> sp.            | SUA510                         | MW425329 | Pakistan    |
| <i>Amanita</i> sp.            | RET 571-2                      | MZ385703 | USA         |
| <i>Amanita</i> sp.            | RET 715-3                      | MN727380 | USA         |
| <i>Amanita</i> sp.            | RET 866-1                      | MT013994 | USA         |
| <i>Amanita</i> sp.            | RET 463-5                      | MH753075 | USA         |
| <i>Amanita</i> sp.            | RET 858-8                      | MZ318066 | USA         |
| <i>Amanita</i> sp.            | S.D. Russell MycoMap # 10025   | MZ668154 | USA         |
|                               | S.D. Russell ONT iNaturalist   |          |             |
| <i>Amanita</i> sp.            | 130311099                      | OP749510 | USA         |
|                               | S.D. Russell ONT iNaturalist   |          |             |
| <i>Amanita</i> sp.            | 98401968                       | OP549077 | USA         |
|                               | S.D. Russell ONT iNaturalist # |          |             |
| <i>Amanita</i> sp.            | 130409549                      | OP643044 | USA         |
| <i>Amanita</i> sp.            | RET 589-5                      | KY549354 | USA         |
| <i>Amanita</i> sp.            | RET 610-10                     | MG992501 | USA         |
| <i>Amanita</i> sp.            | RET 287-7                      | OK285686 | USA         |
| <i>Amanita</i> sp.            | RET 374-3                      | MN614413 | USA         |
| <i>Amanita</i> sp.            | RET 303-9                      | MW592823 | USA         |
| <i>Amanita</i> sp.            | RET 818-6                      | MN614382 | USA         |
| <i>A. submembranacea</i>      | MB -001174                     | MH508626 | Germany     |
| <i>A. suborientifulva</i>     | OR1276                         | MF461584 | Thailand    |
| <i>A. cf. suborientifulva</i> | EFHAAU4437                     | OR042744 | China       |
| <i>A. cf. suborientifulva</i> | EFHAAU5291                     | OR042745 | China       |
| <i>A. tenuifulva</i>          | HKAS58877                      | MH508635 | China       |
| <i>A. umbrinolutea</i>        | HKAS89201                      | MH508637 | China       |
| <i>A. umbrinolutea</i>        | MB-000658                      | MH508641 | Germnay     |
| ' <i>A. vaginata</i> '        | ASIS15487                      | KP004955 | South Korea |
| ' <i>A. vaginata</i> '        | CUB: Microbiology MN18         | AB458889 | Thailand    |
| ' <i>A. vaginata</i> '        | FLAS-F-60889                   | MH016871 | USA         |
| ' <i>A. vaginata</i> '        | -                              | AB451971 | Thailand    |
| <i>A. verrucosivolva</i>      | Wu1628                         | KY886480 | China       |
| <i>A. zonata</i>              | EFHAAU607                      | OR042761 | China       |
| <i>A. zonata</i>              | EFHAAU755                      | OR042762 | China       |
| <i>A. zonata</i>              | HKAS97244                      | MH508656 | China       |
| <b>Outgroup</b>               |                                |          |             |
| <i>A. caesarea</i>            | HKAS96166                      | MH508283 | Italy       |

|                           |           |          |         |
|---------------------------|-----------|----------|---------|
| <i>A. muscaria</i>        | MB-001171 | MH508442 | Germany |
| <i>A. parvipantherina</i> | HKAS54723 | MH508495 | China   |
| <i>A. yuaniana</i>        | HKAS58807 | MH508653 | China   |

---
